# Supplementary material
Source: PubMed Central journal article supplement (PMC1458803)

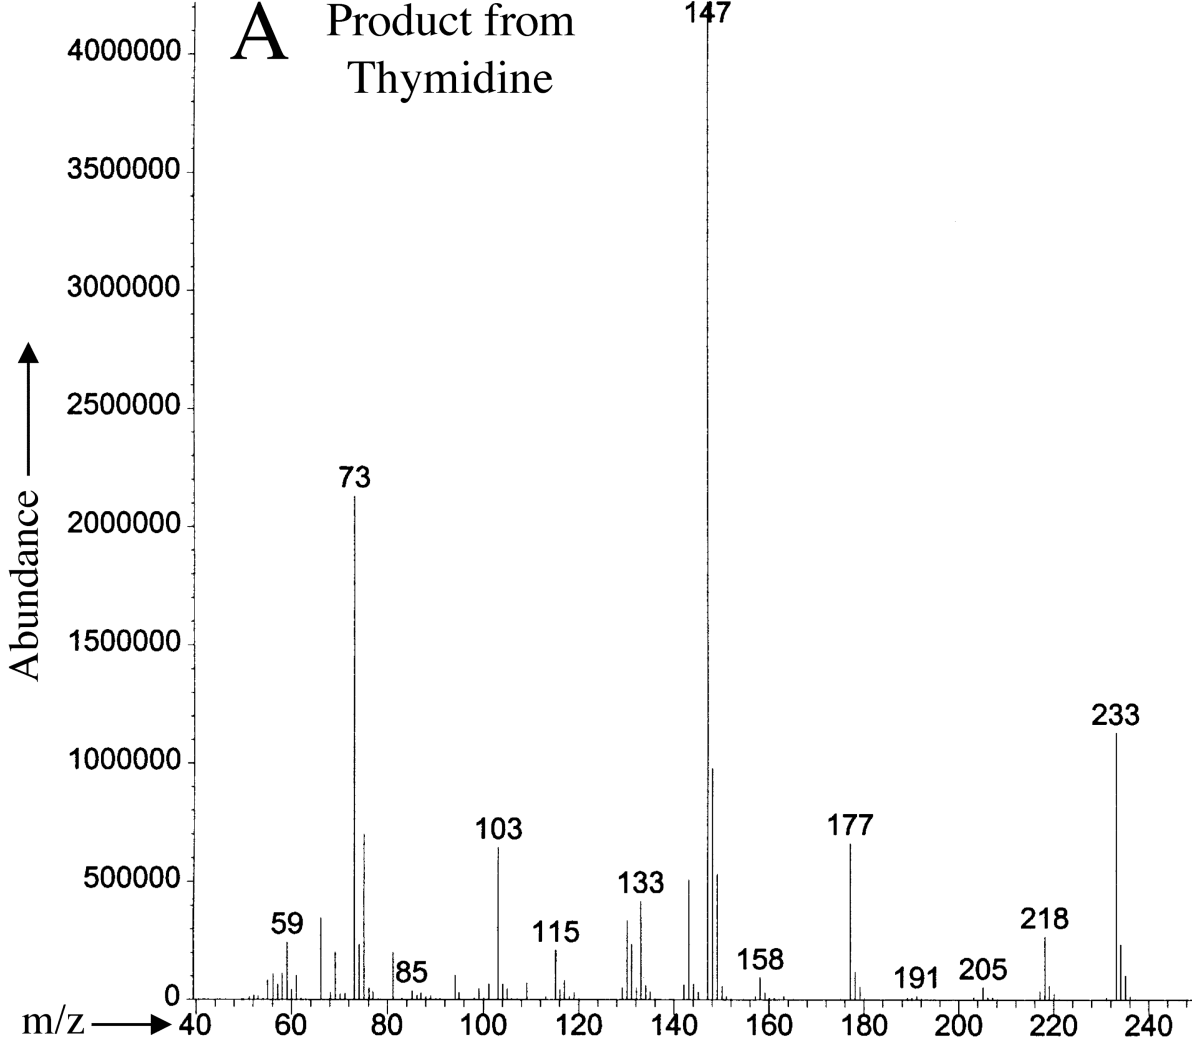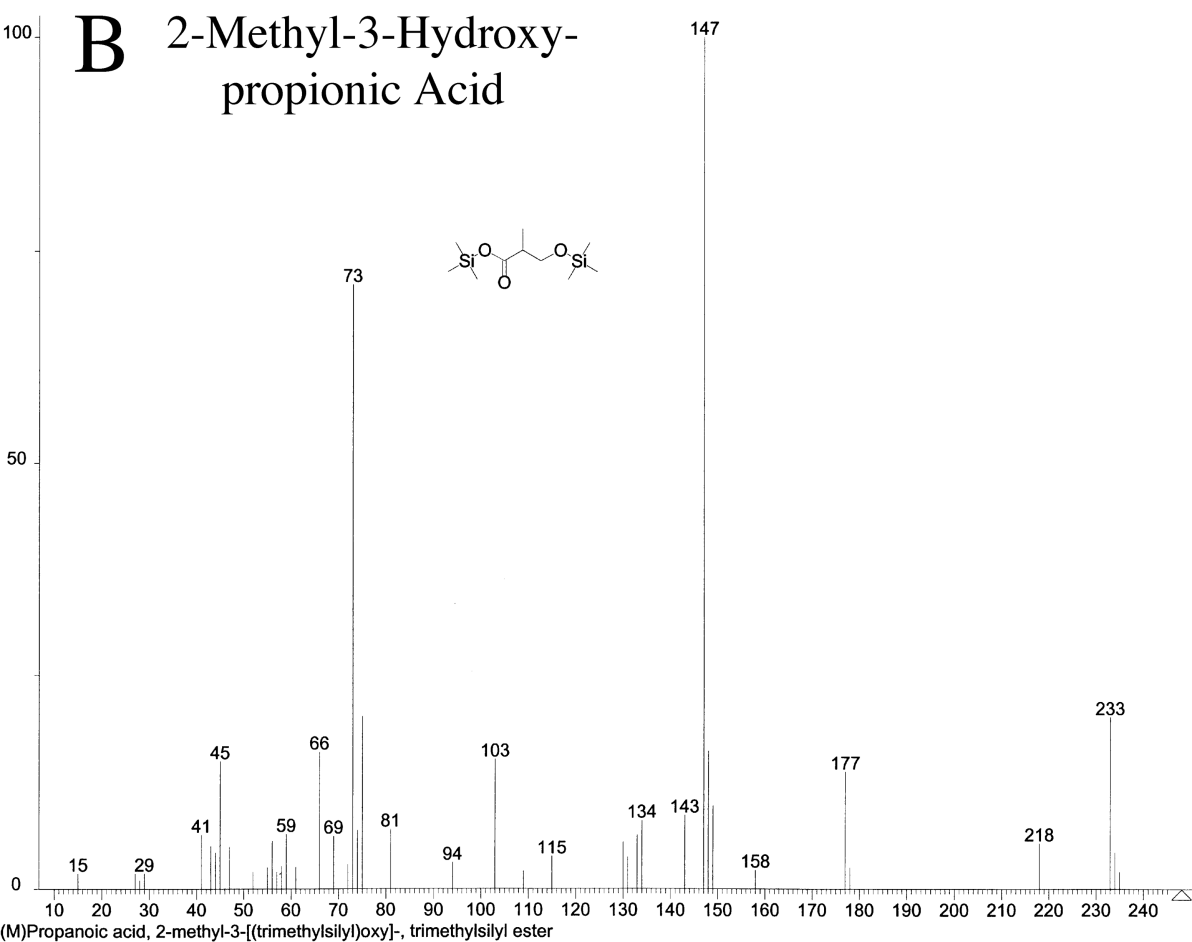

Supplement: pnas_0600521103_1.pdf [file pnas_0600521103_1.pdf]

3-Hydroxypropanoic acid TMS

Response Ratio

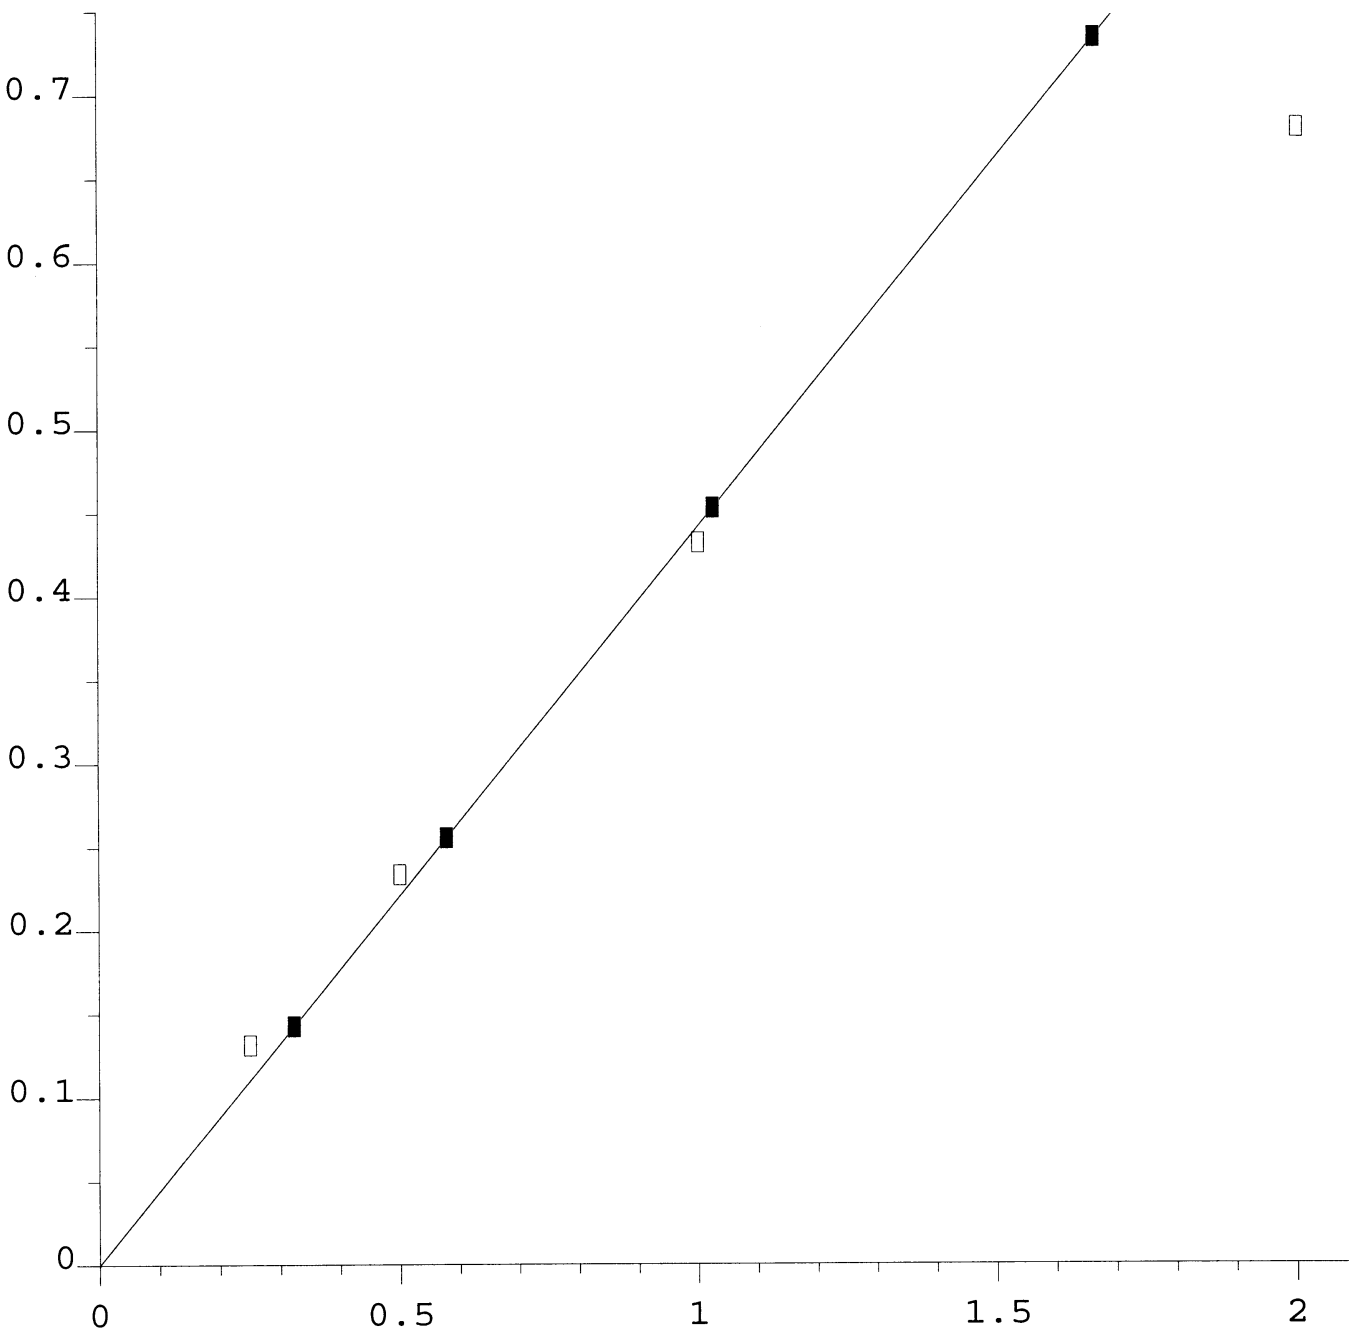

Supplement: pnas_0600521103_2.pdf [file pnas_0600521103_2.pdf]
